# Supplementary material for: Direct growth and post-treatment of zeolitic imidazolate framework-67 on carbon paper: an effective and stable electrode system for electrocatalytic reactions
Source: Royal Society of Chemistry journal article supplement (doi:10.1039/d2ta03922b), 2022-01-01
Supplement: d2ta03922b1.pdf [file d2ta03922b1.pdf]

## Supporting Information

### **Direct Growth and Post-Treatment of Zeolitic Imidazolate Framework-67 on Carbon Paper: Effective and Stable Electrode System for Electrocatalytic Reaction**

*Anh Ngoc Nguyen, Ngoc Minh Tran, and Hyojong Yoo\**

Department of Materials Science and Chemical Engineering, Hanyang University, Ansan,  
Gyeonggi-do, 15588, Republic of Korea

\*Correspondence to: [hjhaha73@hanyang.ac.kr](mailto:hjhaha73@hanyang.ac.kr)

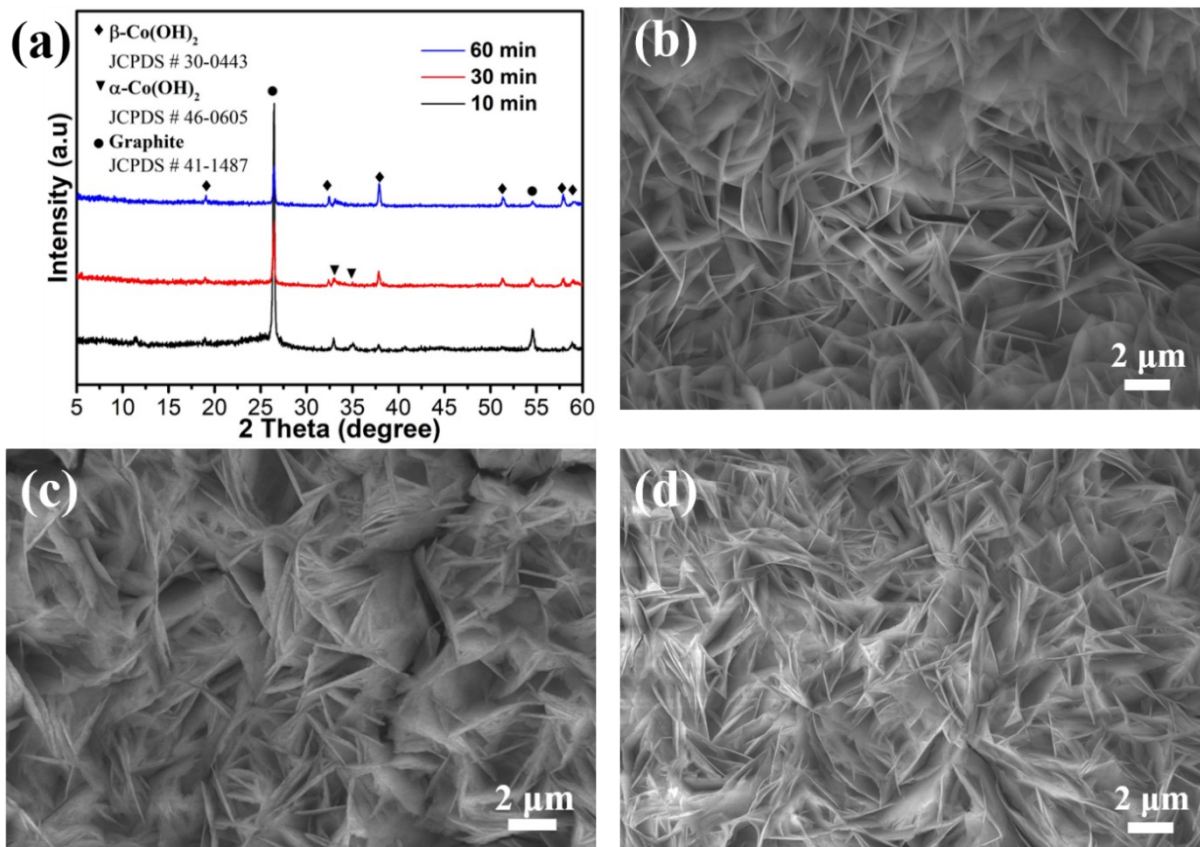

**Figure S1.** (a) XRD patterns and (b-d) SEM images of Co(OH)<sub>2</sub>/CP samples with varied electrodeposition time, including (b) 10 minutes, (c) 30 minutes, (d) 60 minutes.

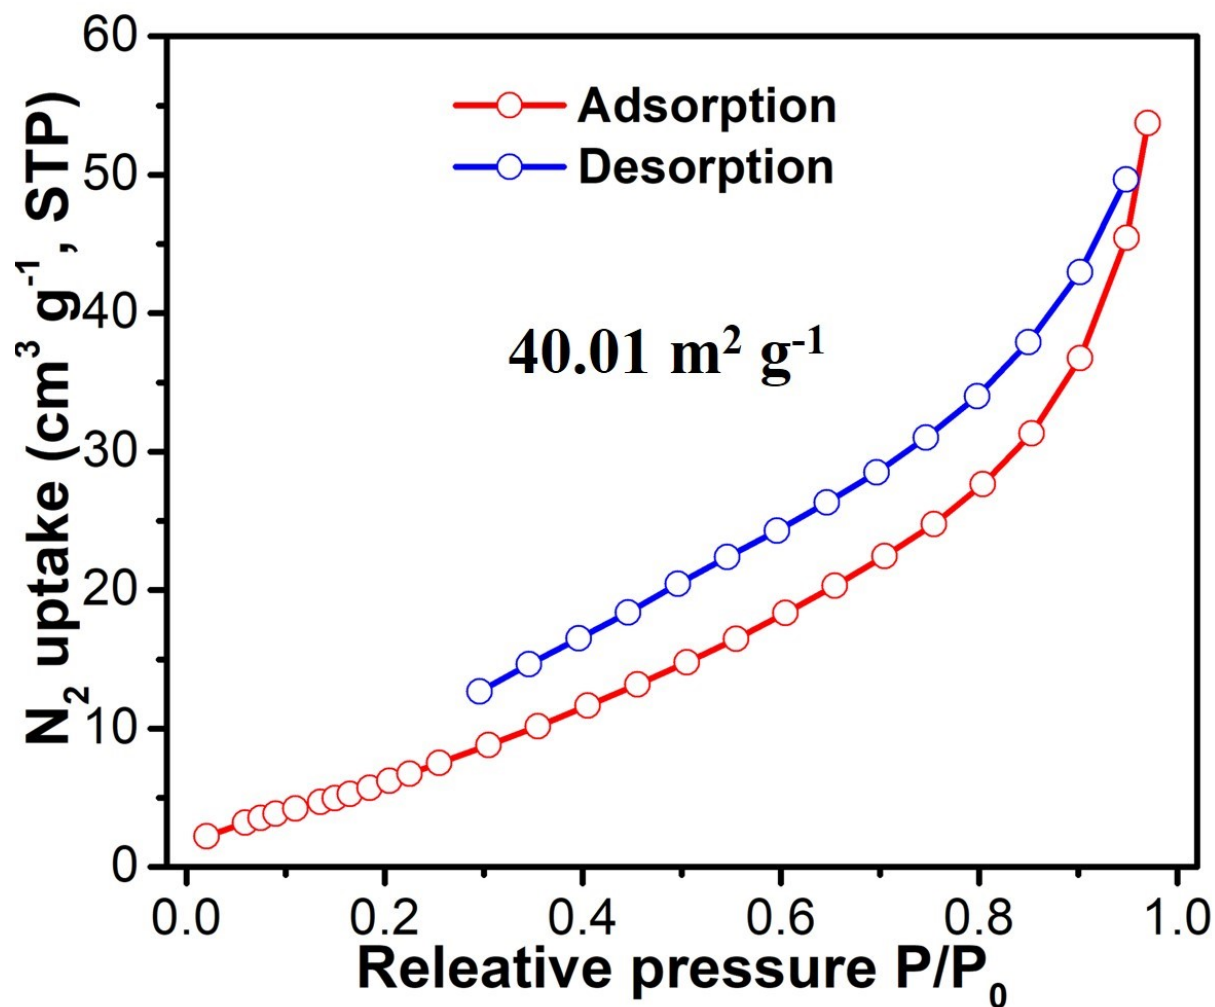

Figure S2. Nitrogen sorption measurement of CS@CH/CP 0.3.

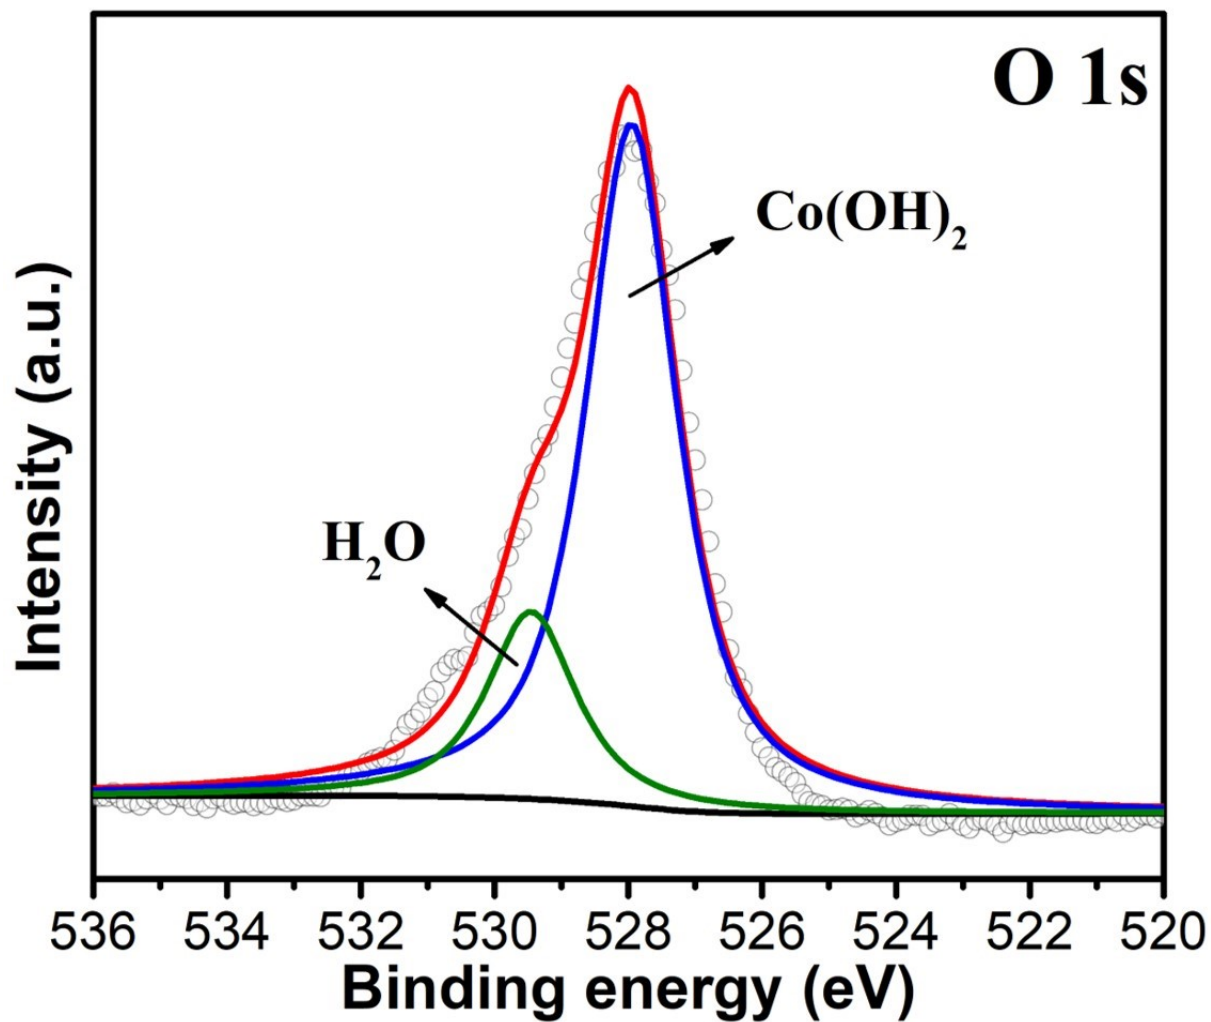

Figure S3. High-resolution XPS spectrum for O 1s of CS@CH/CP 0.3.

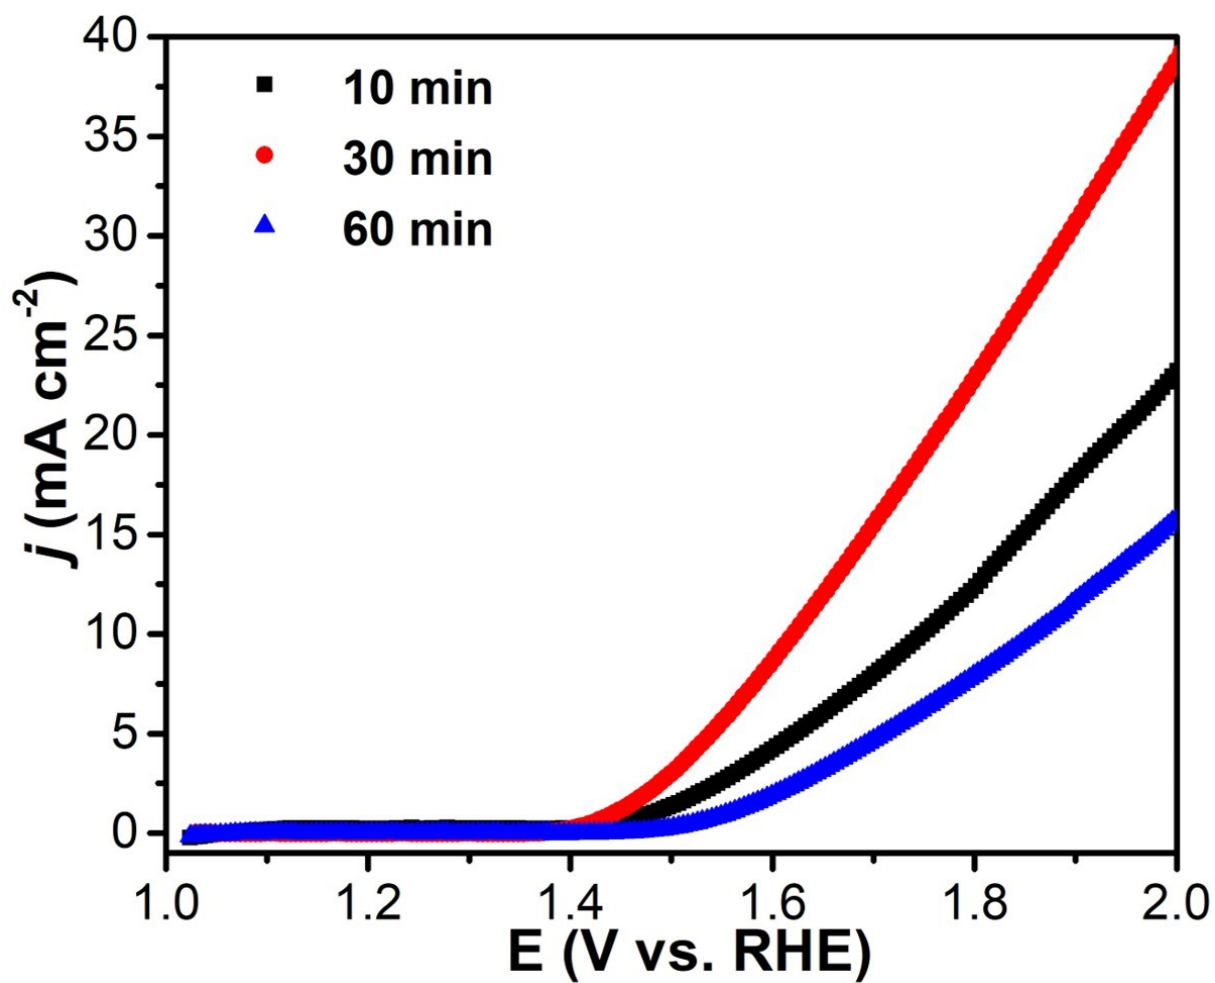

**Figure S4.** OER polarization of Co(OH)<sub>2</sub>/CP with different electrodeposition time of 10, 30, and 60 minutes.

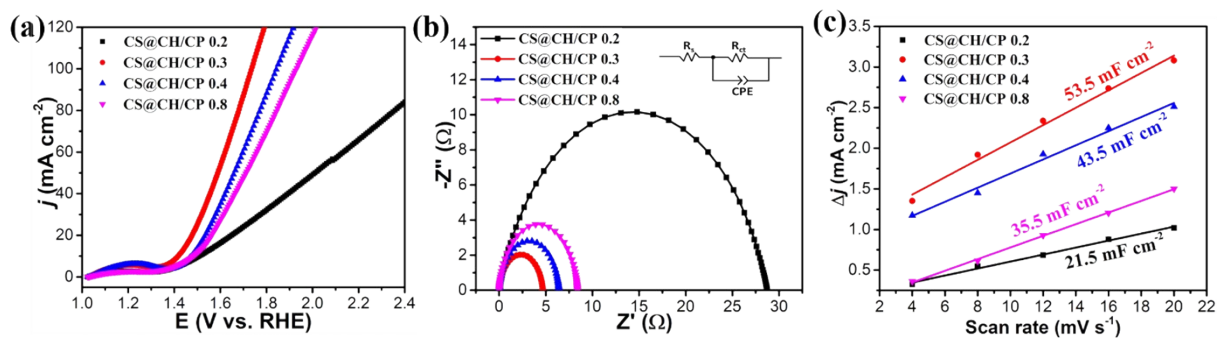

**Figure S5.** (a) OER polarization curves, (b) EIS profiles, and (c)  $C_{dl}$  values for CS@CH/CP samples etched with different thioacetamide concentrations, including 0.2 M, 0.3 M, 0.4 M, and 0.8M.

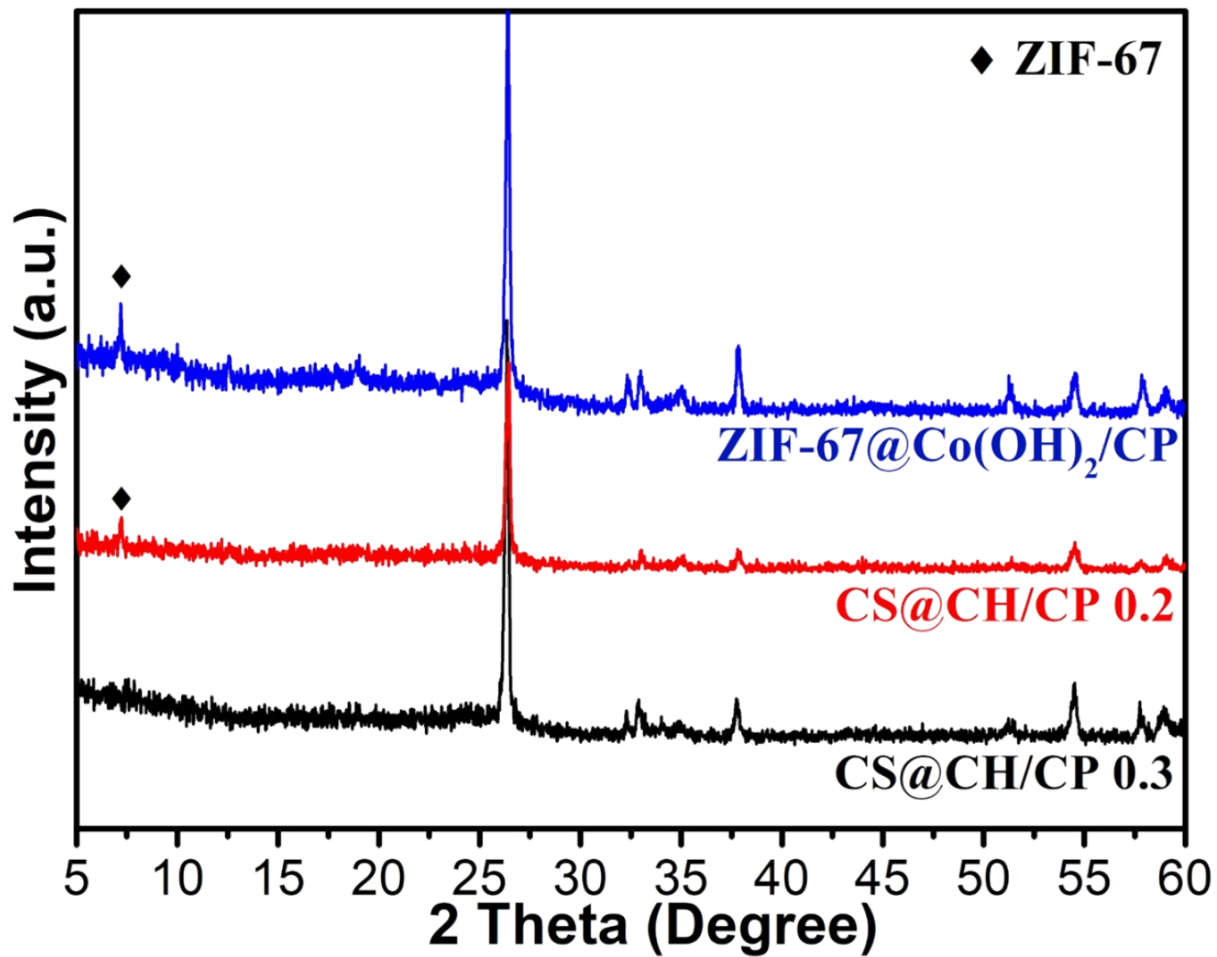

Figure S6. XRD patterns of ZIF-67@Co(OH)<sub>2</sub>/CP, CS@CH/CP 0.2, and CS@CH/CP 0.3.

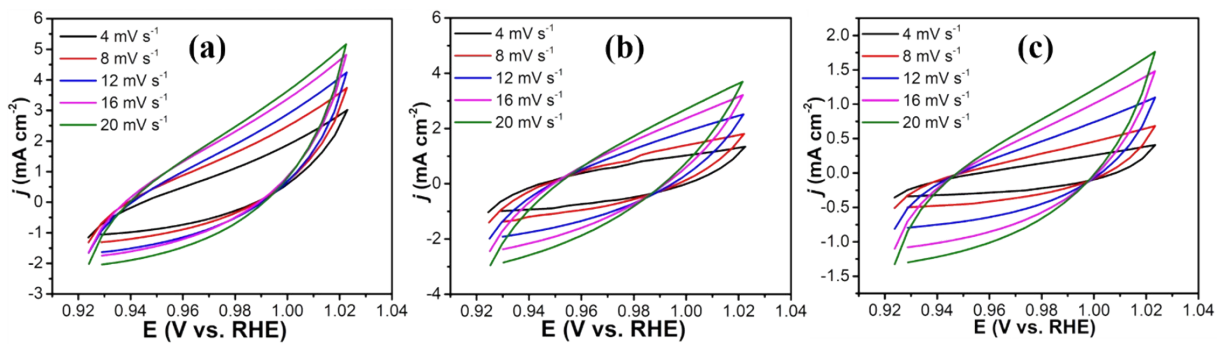

**Figure S7.** CV curves of CS@CH/CP etched with different thioacetamide concentrations: (a) 0.3 M, (b) 0.4 M and (c) 0.8 M.



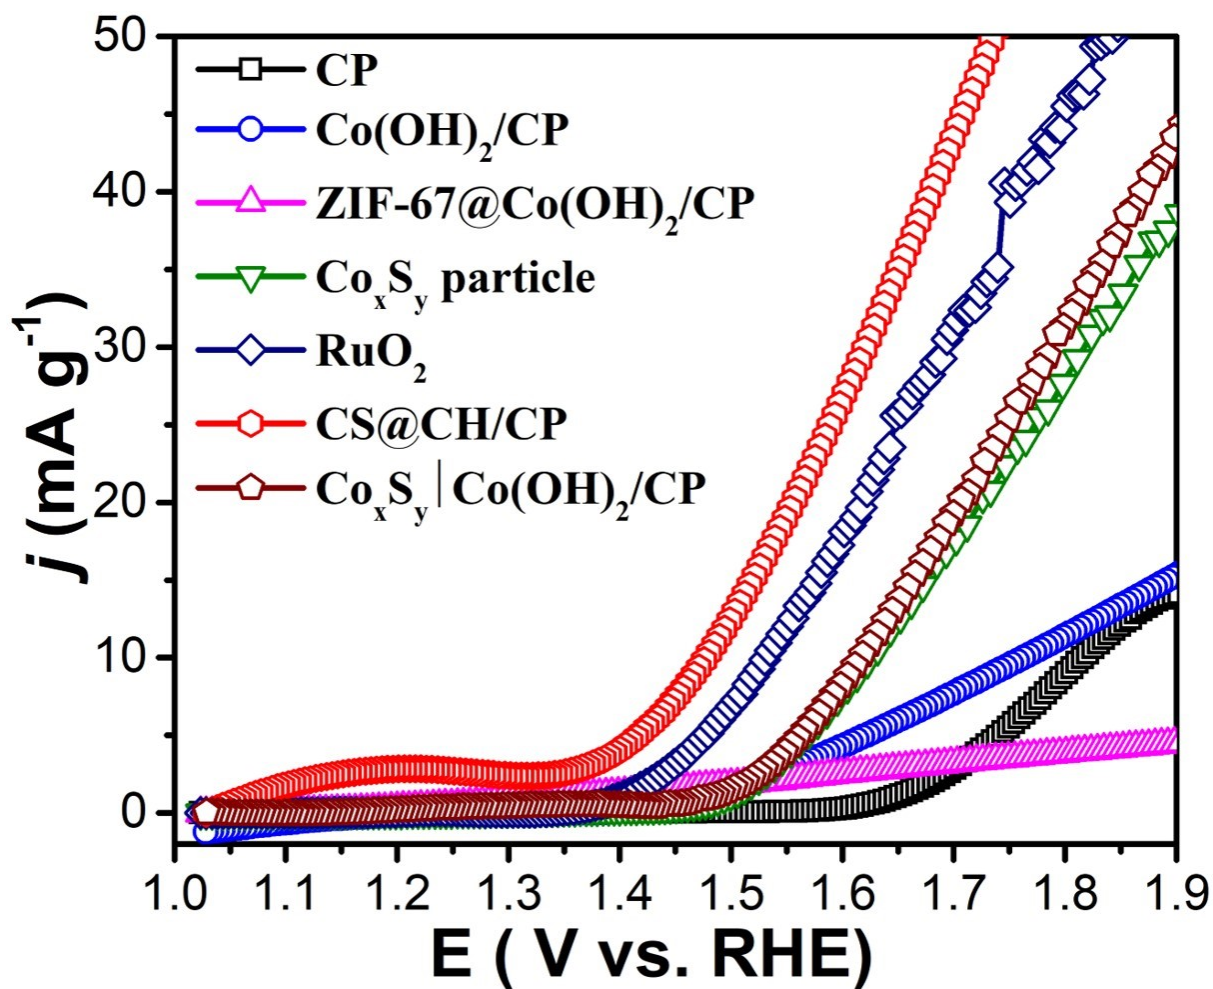

**Figure S8.** Mass normalized OER polarization curves of CP,  $\text{Co(OH)}_2/\text{CP}$ ,  $\text{ZIF-67@Co(OH)}_2/\text{CP}$ ,  $\text{Co}_x\text{S}_y$  particle,  $\text{RuO}_2$ ,  $\text{CS@CH/CP}$ , and  $\text{Co}_x\text{S}_y|\text{Co(OH)}_2/\text{CP}$

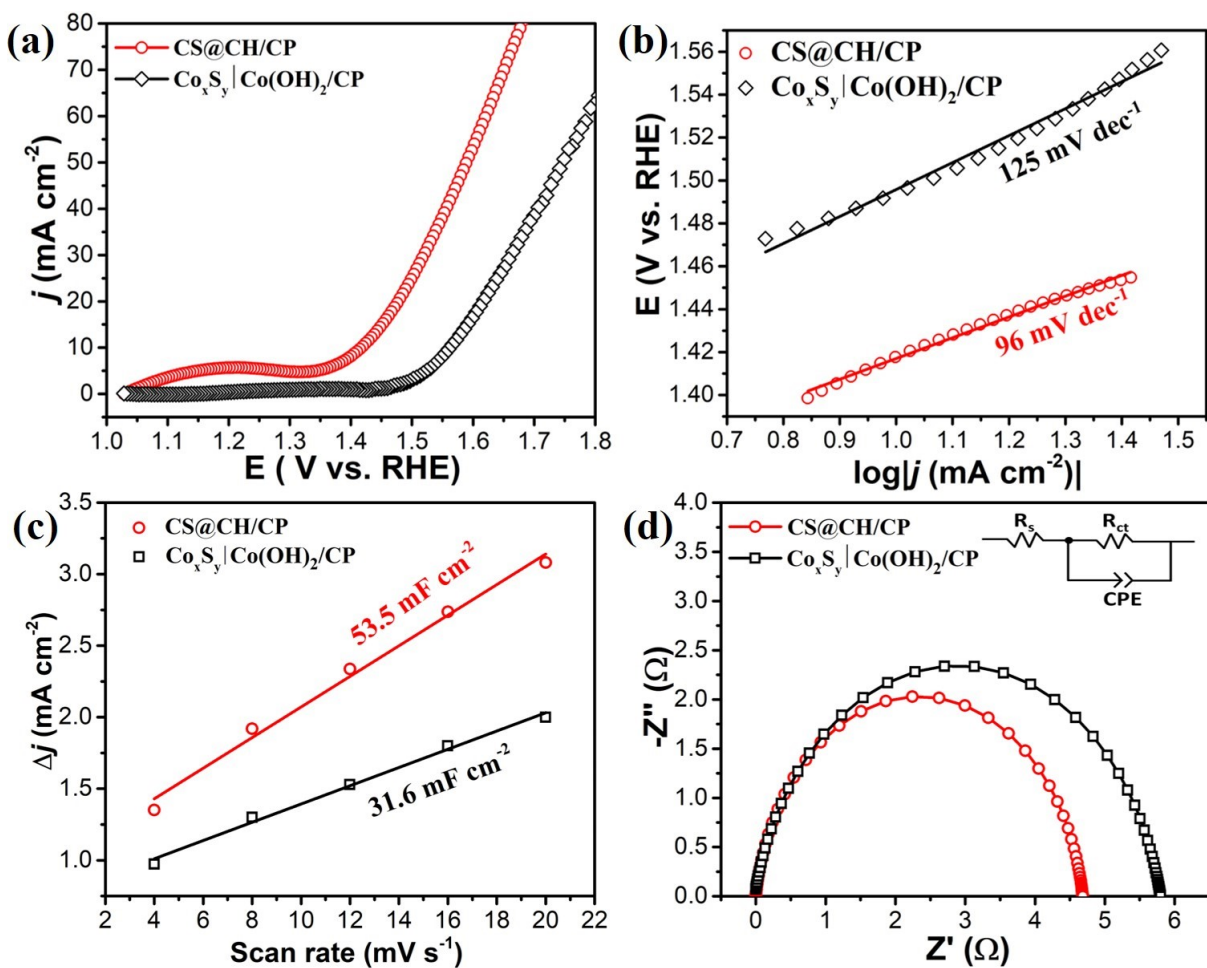

**Figure S9.** Polarization curves of OER performance with CS@CH/CP and Co<sub>x</sub>S<sub>y</sub>|Co(OH)<sub>2</sub>/CP in N<sub>2</sub>-saturated 1.0 M KOH solution: (a) OER polarization curves, (b) Tafel slopes, (c) Cdl values, (d) EIS profiles in the frequency range of 10<sup>5</sup> – 0.01 Hz at 0.75 V.

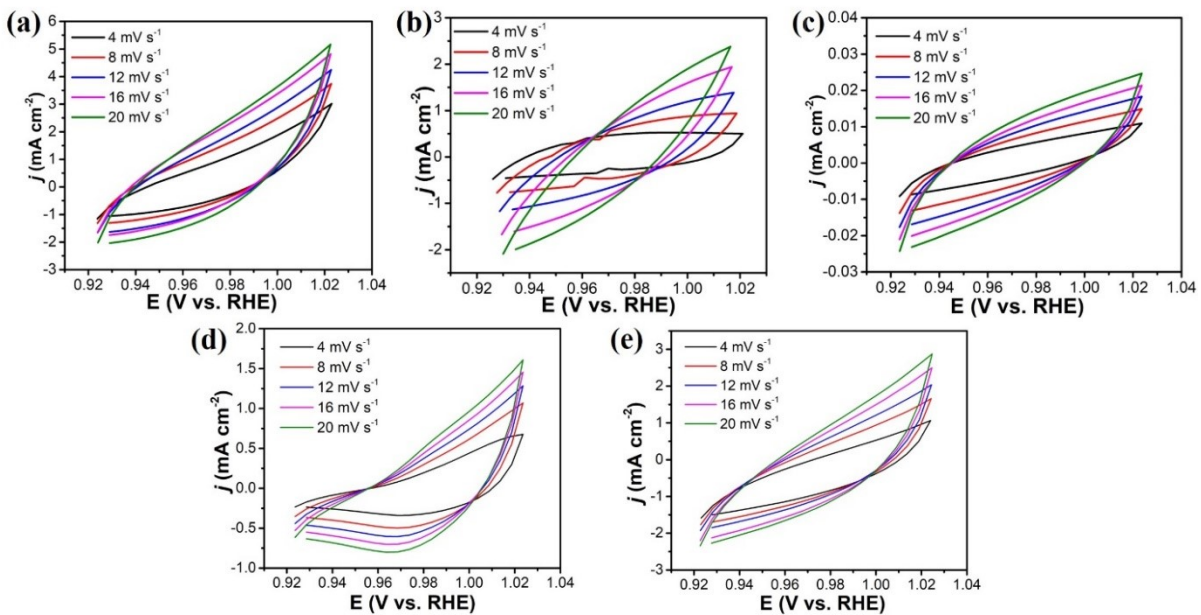

**Figure S10.** CV curves of (a) CS@CH/CP, (b)  $\text{Co(OH)}_2/\text{CP}$ , (c) CP, (d)  $\text{Co}_x\text{S}_y$  particle, and (e)  $\text{Co}_x\text{S}_y|\text{Co(OH)}_2/\text{CP}$  at elevated scan rate of 4, 8, 12, 16, and 20  $\text{mV s}^{-1}$ .

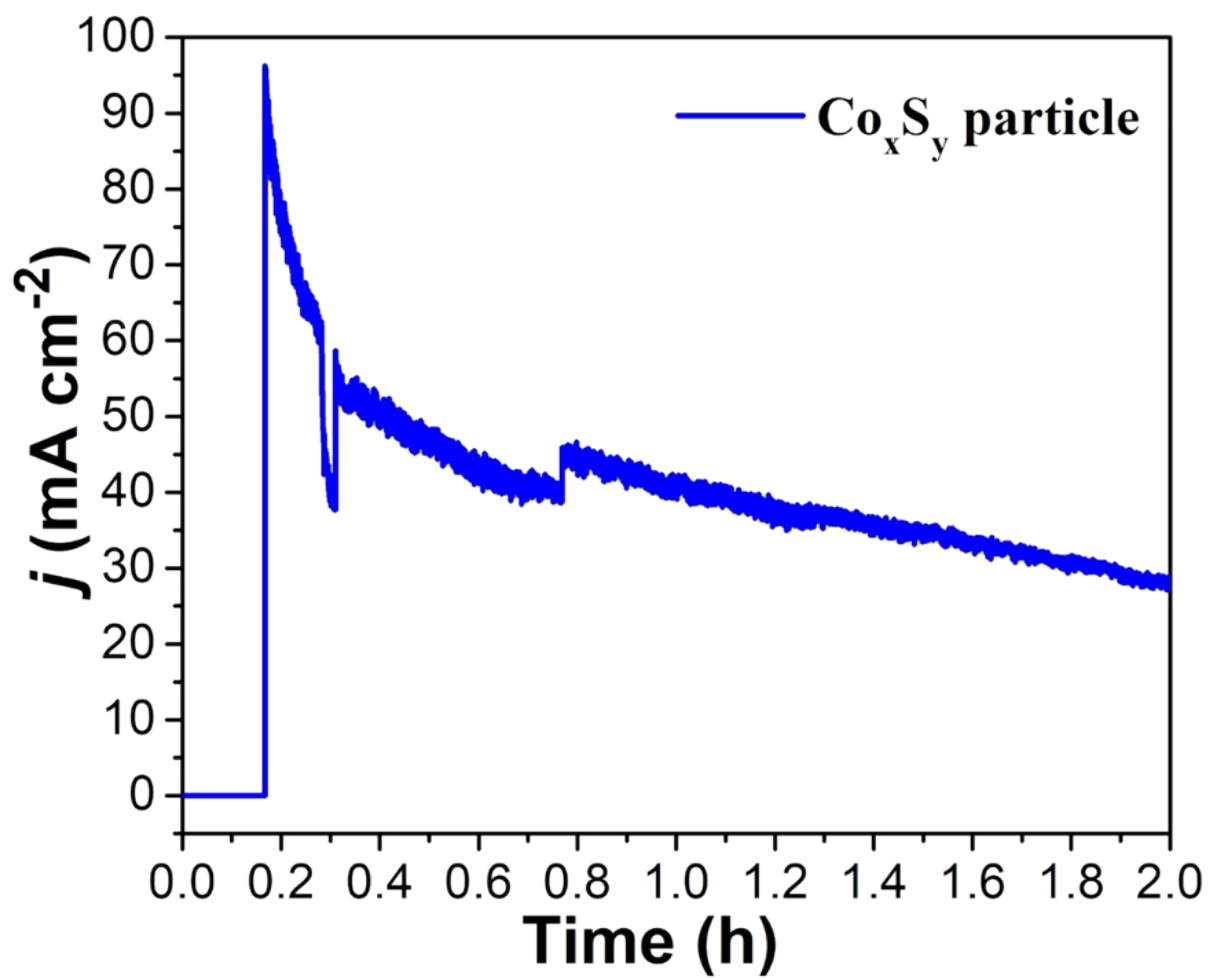

Figure S11. Current density–time curve of  $\text{Co}_x\text{S}_y$  particle.

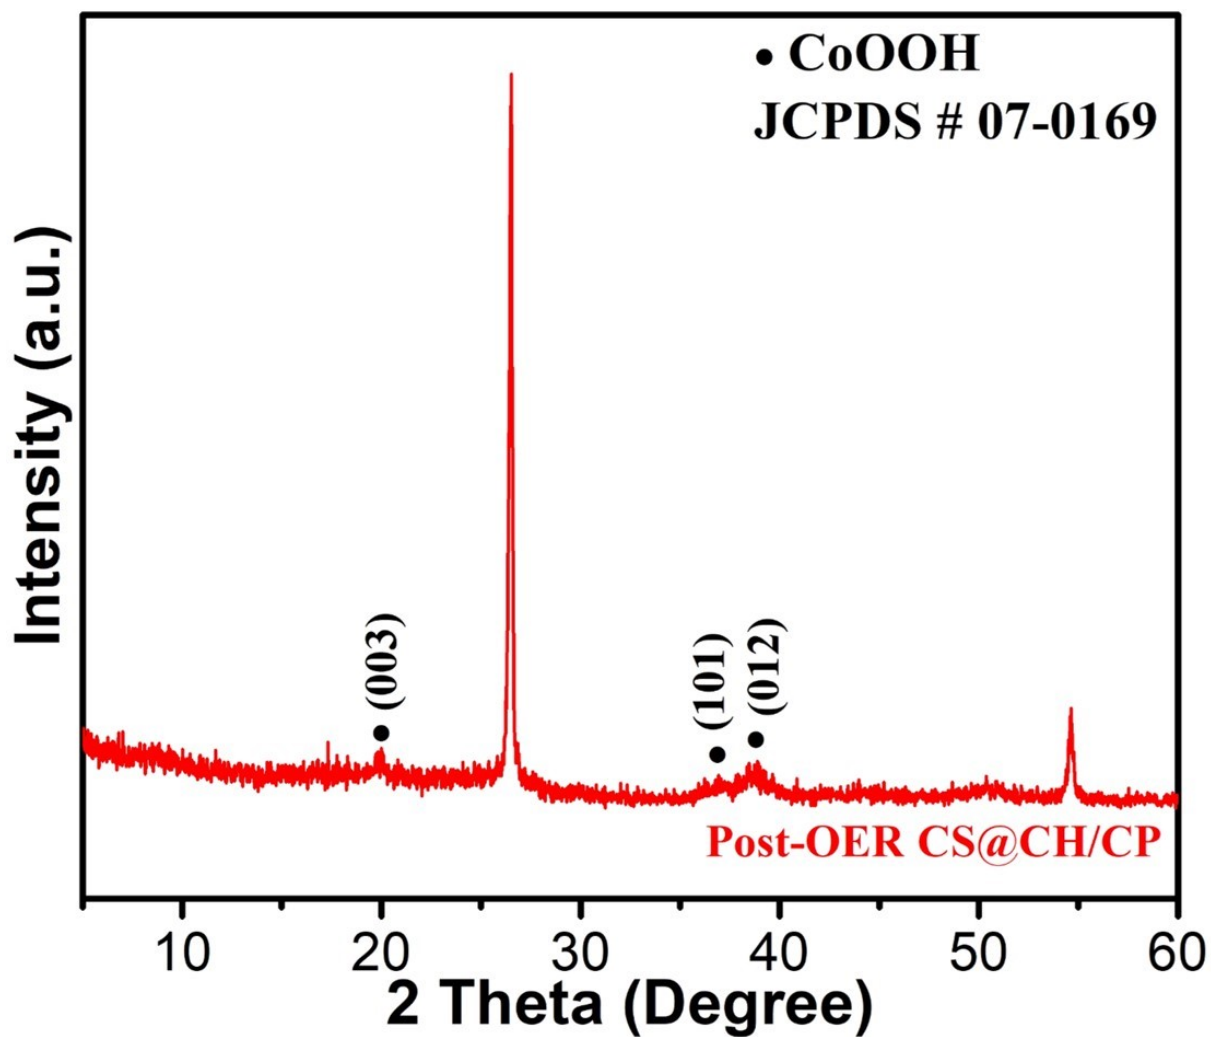

Figure S12. XRD pattern of CS@CH/CP after the stability test.

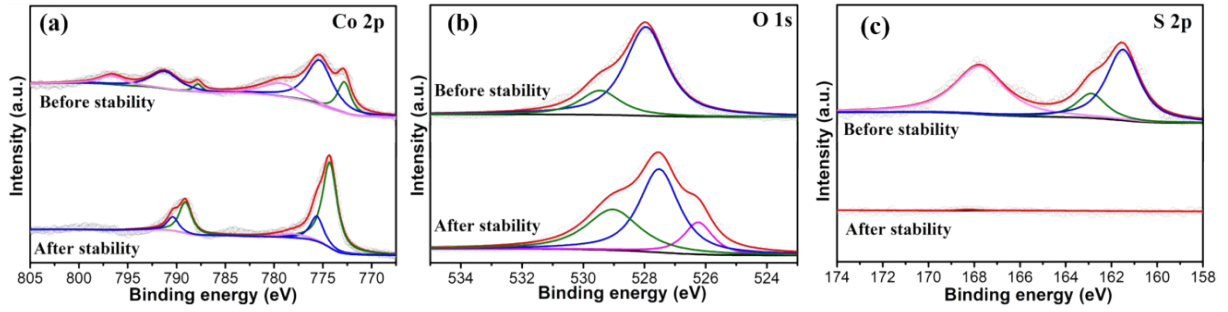

**Figure S13.** High-resolution XPS spectra for (a) Co 2p, (b) O 1s, and (c) S 2p in CS@CH/CP catalyst before and after the stability test.

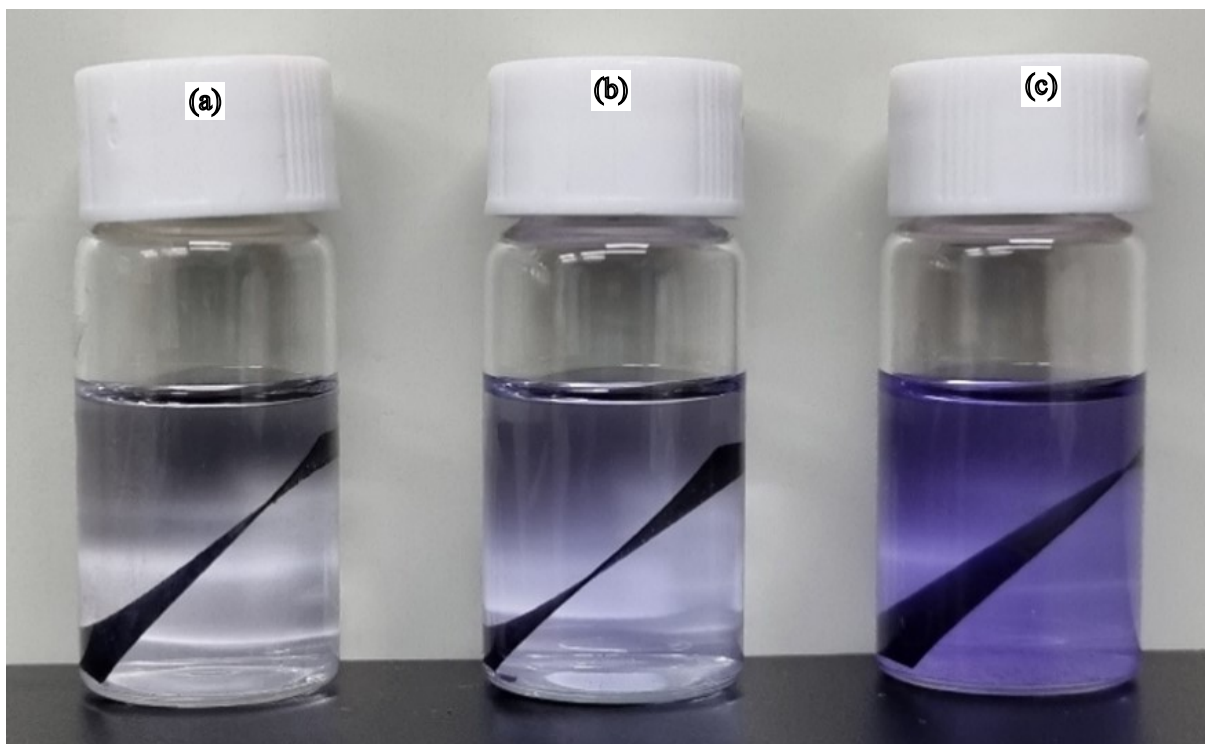

**Figure S14.** Digital images recording the growth of (a) ZIF-67(0.5)@Co(OH)<sub>2</sub>/CP , (b) ZIF-67(1.0)@Co(OH)<sub>2</sub>/CP , and (c) ZIF-67(2.0)@Co(OH)<sub>2</sub>/CP.

**Table S1.** Comparison of OER performance of Co-containing electrocatalysts.

| Catalyst                                                                  | Substrate     | Overpotential at 10 mA cm <sup>-2</sup> | Tafel slope (mV dec <sup>-1</sup> ) | Refs      |
|---------------------------------------------------------------------------|---------------|-----------------------------------------|-------------------------------------|-----------|
| Ni <sub>2.3%</sub> -CoS <sub>2</sub> /CC                                  | Carbon cloth  | 270 mV                                  | 119                                 | 1         |
| CP/CTs/Co-S                                                               | Carbon paper  | 306 mV                                  | 72                                  | 2         |
| CoP <sub>3</sub> NSs/CC                                                   | Carbon cloth  | 291 mV                                  | 72                                  | 3         |
| Zn-Co-S NS/CFP                                                            | Carbon paper  | 390 mV                                  | 136                                 | 4         |
| Zn-Co-S NP/CFP                                                            | Carbon paper  | 330 mV                                  | 97                                  | 4         |
| Zn-Co-S NN/CFP                                                            | Carbon paper  | 320 mV                                  | 55                                  | 4         |
| P-CoMoS/CC                                                                | Carbon cloth  | 260 mV                                  | 70.2                                | 5         |
| CoS <sub>2</sub> /CC                                                      | Carbon cloth  | 290 mV                                  | 67                                  | 6         |
| NiCo <sub>2</sub> S <sub>4</sub> /CC                                      | Carbon cloth  | 240 mV                                  | 90.9                                | 7         |
| CuCo <sub>3</sub> S <sub>z</sub> /CC                                      | Carbon cloth  | 346 mV (at 50 mA cm <sup>-2</sup> )     | 127                                 | 8         |
| CoS <sub>2</sub>                                                          | Carbon cloth  | 350 mV                                  | 107                                 | 9         |
| NiCo <sub>2</sub> S <sub>4</sub> @Co <sub>1</sub> Ni <sub>4</sub> -LDH/CC | Carbon cloth  | 337 mV (at 100 mA cm <sup>-2</sup> )    | 111.2                               | 10        |
| S-NiCoP/CC                                                                | Carbon cloth  | 320 mV (at 20 mA cm <sup>-2</sup> )     | 150                                 | 11        |
| h-Co <sub>x</sub> S <sub>y</sub>                                          | Glassy carbon | 320 mV                                  | 98                                  | 12        |
| Co <sub>9</sub> S <sub>8</sub> @Co <sub>3</sub> O <sub>4</sub> /NF        | Nickel foam   | 331 mV (at 100 mA cm <sup>-2</sup> )    | 65.5                                | 13        |
| Co <sub>9</sub> S <sub>8</sub> /CC                                        | Carbon cloth  | 312 mV                                  | 127                                 | 14        |
| Co <sub>9</sub> S <sub>8</sub> /Co@CC                                     | Carbon cloth  | 265 mV                                  | 77.96                               | 15        |
| FeCoNiP                                                                   | Glassy carbon | 200 mV                                  | ~70                                 | 16        |
| NiCo-UMOFNs                                                               | Copper foam   | 189 mV                                  | 42                                  | 17        |
| CS@CH/CP                                                                  | Carbon paper  | 180 mV                                  | 96                                  | This work |



**Table S2:** Elemental composition of CS@CH/CP 0.2, 0.3, 0.4, 0.8.

| Sample       | S wt% (Norm.) | Co wt% (Norm.) |
|--------------|---------------|----------------|
| CS@CH/CP 0.2 | 20.01         | 54.78          |
| CS@CH/CP 0.3 | 26.90         | 47.90          |
| CS@CH/CP 0.4 | 31.45         | 46.14          |
| CS@CH/CP 0.8 | 41.26         | 40.14          |

**Turnover frequency (TOF) calculation:**

$$TOF = \frac{J \times A}{4 \times F \times n}$$

Where J is current density ( $A\text{ cm}^{-2}$ ), A is the geometry surface area of the electrode with the loaded catalyst, F is Faraday constant ( $96\,500\text{ A s mol}^{-1}$ ), and n is the total mole of active  $\text{Co}^{+2}$  in the catalyst. Assuming that all metal ions are active.

Geometrical area of electrode =  $1\text{ cm}^2$

Mass of loading catalyst =  $2\text{ mg cm}^{-2}$

→ Mass of loading catalyst on  $1\text{ cm}^2$  electrode =  $2\text{ mg}$

For CS@CH/CP 0.3,

Co wt% (based on EDX result in Table S2) =  $47.90\text{ wt}\%$

Current density at  $\eta_{300\text{ mV}} = 45\text{ mA cm}^{-2}$

→ Total mole of Co in the catalyst =  $1.60 \times 10^{-5}\text{ (mol)}$

$$\rightarrow \text{TOF (at the overpotential of 300 mV)} = \frac{45 \times 10^{-3} \text{ A cm}^{-2} \times 1 \text{ cm}^2}{4 \times 96485 \text{ A s mol}^{-1} \times 1.60 \times 10^{-5} \text{ mol}} = 0.0073 \text{ s}^{-1}$$

Using the same calculation, the TOF values of CS@CH/CP 0.2, CS@CH/CP 0.4, CS@CH/CP 0.8; Co(OH)<sub>2</sub>/CP; RuO<sub>2</sub> and CoS particle are 0.0011; 0.0050; 0.0036; 0.0006; 0.0041; and 0.0008 s<sup>-1</sup>, respectively.

## REFERENCES

- 1 W. Fang, D. Liu, Q. Lu, X. Sun and A. M. Asiri, *Electrochem. commun.*, 2016, **63**, 60–64.
- 2 J. Wang, H. X. Zhong, Z. L. Wang, F. L. Meng and X. B. Zhang, *ACS Nano*, 2016, **10**, 2342–2348.
- 3 T. Wu, M. Pi, X. Wang, W. Guo, D. Zhang and S. Chen, *J. Alloys Compd.*, 2017, **729**, 203–209.
- 4 X. Wu, X. Han, X. Ma, W. Zhang, Y. Deng, C. Zhong and W. Hu, *ACS Appl. Mater. Interfaces*, 2017, **9**, 12574–12583.
- 5 C. Ray, S. C. Lee, K. V. Sankar, B. Jin, J. Lee, J. H. Park and S. C. Jun, *ACS Appl. Mater. Interfaces*, 2017, **9**, 37739–37749.
- 6 Y. H. Deng, C. Ye, B. X. Tao, G. Chen, Q. Zhang, H. Q. Luo and N. B. Li, *J. Power Sources*, 2018, **397**, 44–51.
- 7 W. Zhu, M. Ren, N. Hu, W. Zhang, Z. Luo, R. Wang, J. Weng, L. Huang, Y. Suo and J. Wang, *ACS Sustain. Chem. Eng.*, 2018, **6**, 5011–5020.
- 8 C. Mahala, R. Sharma, M. D. Sharma and S. Pande, *ChemElectroChem*, 2019, **6**, 5301–5312.
- 9 J. Zhang, X. Bai, T. Wang, W. Xiao, P. Xi, J. Wang, D. Gao and J. Wang, *Nano-Micro Lett.*, 2019, **11**, 1–13.
- 10 F. Yuan, J. Wei, G. Qin and Y. Ni, *J. Alloys Compd.*, 2020, **830**, 154658.
- 11 L. N. Mai-Thi, N. V. Hoang-Thy and Q. B. Bui, *Mater. Chem. Phys.*, 2021, **270**, 124746.
- 12 Z. Zhang, S. Li, X. Bu, Y. Dai, J. Wang, X. Bao and T. Wang, *New J. Chem.*, 2021, **45**, 17313–17319.
- 13 X. Wang, Y. He, X. Han, J. Zhao, L. Li, J. Zhang, C. Zhong, Y. Deng and W. Hu, *Nano Res.*, 2022, **15**, 1246–1253.
- 14 C. Zhan, Z. Liu, Y. Zhou, M. Guo, X. Zhang, J. Tu, L. Ding and Y. Cao, *Nanoscale*, 2019, **11**, 3193–3199.
- 15 Z. Nie, T. Liu, Y. Chen, P. Liu, Y. Zhang, Z. Fan, H. He, S. Chen and F. Zhang,

*Electrochim. Acta*, 2022, **402**, 139558.

- 16 J. Xu, J. Li, D. Xiong, B. Zhang, Y. Liu, K. H. Wu, I. Amorim, W. Li and L. Liu, *Chem. Sci.*, 2018, **9**, 3470–3476.
- 17 S. Zhao, Y. Wang, J. Dong, C. T. He, H. Yin, P. An, K. Zhao, X. Zhang, C. Gao, L. Zhang, J. Lv, J. Wang, J. Zhang, A. M. Khattak, N. A. Khan, Z. Wei, J. Zhang, S. Liu, H. Zhao and Z. Tang, *Nat. Energy*, 2016, **1**, 1–10.
